# Supplementary material for: Flexible and enhanced thermal conductivity of a Al2O3@polyimide hybrid film via coaxial electrospinning
Source: Royal Society of Chemistry journal article supplement (doi:10.1039/c5ra00718f), 2015-01-01
Supplement: c5ra00718f1.pdf [file c5ra00718f1.pdf]

PAPER

## Flexible and enhanced thermal conductivity of $\text{Al}_2\text{O}_3$ @Polyimide hybrid film *via* coaxial electrospinning

Cite this: DOI: 10.1039/x0xx00000x

Received 00th January 2012,

Accepted 00th January 2012

DOI: 10.1039/x0xx00000x

www.rsc.org/

Jianwen Xia,<sup>ab</sup> Guoping Zhang,<sup>a,c\*</sup> Libo Deng,<sup>a</sup> Haipeng Yang,<sup>b</sup> Rong Sun,<sup>a\*</sup> and Ching-Ping Wong<sup>a,c</sup>

A novel core-shell structure of  $\text{Al}_2\text{O}_3$  nanoparticles (NPs) attached on poly (amic acid) (PAA) fiber has been successfully developed by facile coaxial electrospinning technology for the first time. The as-prepared PAA fiber went through imidization to prepare  $\text{Al}_2\text{O}_3$ @polyimide ( $\text{Al}_2\text{O}_3$ @PI) film. The resultant films with different  $\text{Al}_2\text{O}_3$  contents are characterized by scanning electron microscopy, Fourier transform infrared spectroscopy, thermal gravimetric analysis, and dynamical mechanical analysis, respectively. The results indicated that the  $\text{Al}_2\text{O}_3$  NPs could uniformly coat the surface of fibers with a diameter of about 1  $\mu\text{m}$  which enhanced thermal and mechanical properties of fiber-based film. Especially for the flexible film with the content of  $\text{Al}_2\text{O}_3$  as high as 59.3 wt%, it present a high storage modulus (2.11GPa) and excellent thermal stability (474 °C at 5% mass loss) as well as superior thermal conductivity of 9.66  $\text{Wm}^{-1}\text{K}^{-1}$  in plane. At last, compared with pure PI film, the  $\text{Al}_2\text{O}_3$ @PI fiber-based film exhibits excellent thermal transfer ability in the light emitting diode packaging. Therefore, the novel  $\text{Al}_2\text{O}_3$ @PI fiber-based film with integrated properties of insulation, thermal conductivity and flexibility can be used for wearable electronics and power devices.

### Supporting information

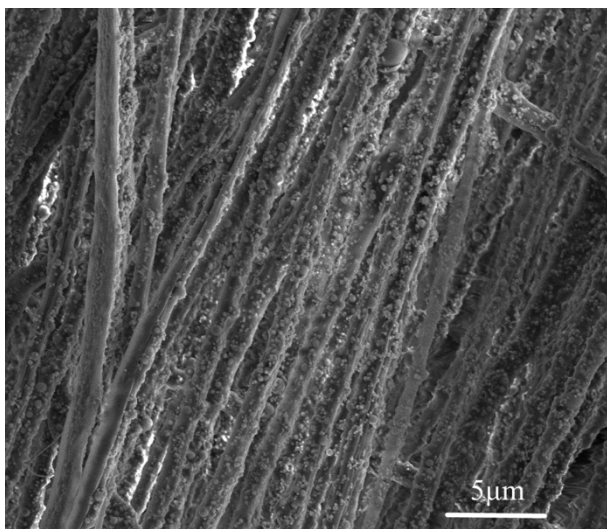

Fig. S1 SEM image of 74.5 wt%  $\text{Al}_2\text{O}_3$ @PAA with PVP

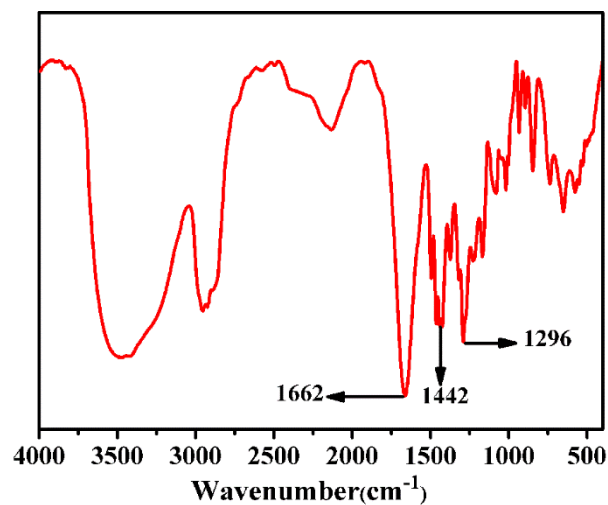

Fig. S2 FTIR spectrum of PVP

Table S1 The thermal properties of composites with different contents of Al<sub>2</sub>O<sub>3</sub> NPs

| Al <sub>2</sub> O <sub>3</sub><br>(wt%) | Density<br>(g·cm <sup>-3</sup> ) | Heat<br>capacity<br>(J·K <sup>-1</sup> ·g <sup>-1</sup> ) | Thermal<br>diffusion<br>(mm <sup>2</sup> ·s <sup>-1</sup> ) | Thermal<br>conductivity<br>(W·m <sup>-1</sup> ·k <sup>-1</sup> ) |
|-----------------------------------------|----------------------------------|-----------------------------------------------------------|-------------------------------------------------------------|------------------------------------------------------------------|
| 0                                       | 0.669                            | 1.187                                                     | 4.789 ± 0.544                                               | 3.80 ± 0.43                                                      |
| 26.7                                    | 0.990                            | 1.182                                                     | 4.834 ± 0.626                                               | 5.66 ± 0.73                                                      |
| 42.2                                    | 1.233                            | 1.141                                                     | 5.107 ± 0.330                                               | 7.18 ± 0.46                                                      |
| 59.3                                    | 1.300                            | 1.062                                                     | 7.000 ± 0.234                                               | 9.66 ± 0.32                                                      |
| 74.5                                    | 1.492                            | 0.916                                                     | 7.242 ± 0.320                                               | 9.90 ± 0.44                                                      |
